# Supplementary material
Source: MDPI journal article supplement (https://www.mdpi.com/2254-9625/12/12/130)
Supplement: s1 [file s1]

**Table S1.** Checklist of items that should be included in reports of case-control studies according to STROBE guidelines [27].

|                              | Item No | Recommendation                                                                                                                                                                                    | Lines                     |
|------------------------------|---------|---------------------------------------------------------------------------------------------------------------------------------------------------------------------------------------------------|---------------------------|
| Title and abstract           | 1       | (a) Indicate the study’s design with a commonly used term in the title or the abstract                                                                                                            | 2, 13                     |
|                              |         | (b) Provide in the abstract an informative and balanced summary of what was done and what was found                                                                                               | 13-27                     |
| Introduction                 |         |                                                                                                                                                                                                   |                           |
| Background/rationale         | 2       | Explain the scientific background and rationale for the investigation being reported                                                                                                              | 32-76                     |
| Objectives                   | 3       | State specific objectives, including any prespecified hypotheses                                                                                                                                  | 76-80                     |
| Methods                      |         |                                                                                                                                                                                                   |                           |
| Study design                 | 4       | Present key elements of study design early in the paper                                                                                                                                           | 83-98                     |
| Setting                      | 5       | Describe the setting, locations, and relevant dates, including periods of recruitment, exposure, follow-up, and data collection                                                                   | 84-85                     |
| Participants                 | 6       | (a) Give the eligibility criteria, and the sources and methods of case ascertainment and control selection. Give the rationale for the choice of cases and controls                               | 87-98                     |
|                              |         | (b) For matched studies, give matching criteria and the number of controls per case                                                                                                               | 93-98                     |
| Variables                    | 7       | Clearly define all outcomes, exposures, predictors, potential confounders, and effect modifiers. Give diagnostic criteria, if applicable                                                          | 109-163                   |
| Data sources/<br>measurement | 8       | For each variable of interest, give sources of data and details of methods of assessment (measurement). Describe comparability of assessment methods if there is more than one group              | 112-171                   |
| Bias                         | 9       | Describe any efforts to address potential sources of bias                                                                                                                                         | 96-98                     |
| Study size                   | 10      | Explain how the study size was arrived at                                                                                                                                                         | 99-103                    |
| Quantitative variables       | 11      | Explain how quantitative variables were handled in the analyses. If applicable, describe which groupings were chosen and why                                                                      | 112-171                   |
| Statistical methods          | 12      | (a) Describe all statistical methods, including those used to control for confounding                                                                                                             | 165-173                   |
|                              |         | (b) Describe any methods used to examine subgroups and interactions                                                                                                                               | NA                        |
|                              |         | (c) Explain how missing data were addressed                                                                                                                                                       | 170-171                   |
|                              |         | (d) If applicable, explain how matching of cases and controls was addressed                                                                                                                       | NA                        |
|                              |         | (e) Describe any sensitivity analyses                                                                                                                                                             | 132-133, 139-140, 152-153 |
| Results                      |         |                                                                                                                                                                                                   |                           |
| Participants                 | 13      | (a) Report numbers of individuals at each stage of study—eg numbers potentially eligible, examined for eligibility, confirmed eligible, included in the study, completing follow-up, and analysed | 175-185                   |

|                          |    |                                                                                                                                                                                                                 |             |
|--------------------------|----|-----------------------------------------------------------------------------------------------------------------------------------------------------------------------------------------------------------------|-------------|
|                          |    | (b) Give reasons for non-participation at each stage                                                                                                                                                            | 175-185     |
|                          |    | (c) Consider use of a flow diagram                                                                                                                                                                              | NA          |
| Descriptive data         | 14 | (a) Give characteristics of study participants (eg demographic, clinical, social) and information on exposures and potential confounders                                                                        | 185         |
|                          |    | (b) Indicate number of participants with missing data for each variable of interest                                                                                                                             | NA          |
| Outcome data             | 15 | Report numbers in each exposure category, or summary measures of exposure                                                                                                                                       | NA          |
| Main results             | 16 | (a) Give unadjusted estimates and, if applicable, confounder-adjusted estimates and their precision (eg, 95% confidence interval).<br>Make clear which confounders were adjusted for and why they were included | 192-211     |
|                          |    | (b) Report category boundaries when continuous variables were categorized                                                                                                                                       | See item 11 |
|                          |    | (c) If relevant, consider translating estimates of relative risk into absolute risk for a meaningful time period                                                                                                | NA          |
| Other analyses           | 17 | Report other analyses done—eg analyses of subgroups and interactions, and sensitivity analyses                                                                                                                  | 187-191     |
| <b>Discussion</b>        |    |                                                                                                                                                                                                                 |             |
| Key results              | 18 | Summarise key results with reference to study objectives                                                                                                                                                        | 213-214     |
| Limitations              | 19 | Discuss limitations of the study, taking into account sources of potential bias or imprecision. Discuss both direction and magnitude of any potential bias                                                      | 320-339     |
| Interpretation           | 20 | Give a cautious overall interpretation of results considering objectives, limitations, multiplicity of analyses, results from similar studies, and other relevant evidence                                      | 214-318     |
| Generalisability         | 21 | Discuss the generalisability (external validity) of the study results                                                                                                                                           | 341-374     |
| <b>Other information</b> |    |                                                                                                                                                                                                                 |             |
| Funding                  | 22 | Give the source of funding and the role of the funders for the present study and, if applicable, for the original study on which the present article is based                                                   | NA          |

NA: not applicable.

**Table S2.** Tests of normality (Kolmogorov-Smirnov with Lilliefors Significance Correction and Shapiro-Wilks) for continuous variables derived from questionnaires.

| Variable   | Kolmogorov-Smirnov |     |          | Shapiro-Wilk |     |          |
|------------|--------------------|-----|----------|--------------|-----|----------|
|            | Statistic          | df  | <i>p</i> | Statistic    | df  | <i>p</i> |
| Effort     | 0.098              | 883 | 0.000    | 0.958        | 883 | 0.000    |
| Reward     | 0.069              | 883 | 0.000    | 0.987        | 883 | 0.000    |
| ERI        | 0.107              | 883 | 0.000    | 0.892        | 883 | 0.000    |
| Anxiety    | 0.135              | 892 | 0.000    | 0.912        | 892 | 0.000    |
| Depression | 0.186              | 892 | 0.000    | 0.883        | 892 | 0.000    |
| Happiness  | 0.176              | 859 | 0.000    | 0.935        | 859 | 0.000    |
| PSQI       | 0.127              | 883 | 0.000    | 0.947        | 883 | 0.000    |

a. Lilliefors Significance Correction. df: degrees of freedom

**Table S3.** Multivariate logistic regression of factors associated with headache.

|            | <i>p</i> | OR    | 95% C.I. |       |
|------------|----------|-------|----------|-------|
|            |          |       | Lower    | Upper |
| Sex (male) | 0.339    | 1.174 | 0.845    | 1.631 |
| Age        | 0.336    | 0.993 | 0.978    | 1.007 |
| ERI        | 0.121    | 1.316 | 0.930    | 1.860 |
| Anxiety    | 0.000    | 1.283 | 1.176    | 1.401 |
| Depression | 0.550    | 0.968 | 0.868    | 1.078 |
| Happiness  | 0.787    | 1.012 | 0.928    | 1.104 |
| PSQI_score | 0.059    | 1.062 | 0.998    | 1.131 |
| Constant   | 0.020    | 0.279 |          |       |

OR= odds ratio; 95%CI confidence interval at 95%
